# Supplementary material for: Flame-retardant effect of a phenethyl-bridged DOPO derivative and layered double hydroxides for epoxy resin
Source: Royal Society of Chemistry journal article supplement (doi:10.1039/c7ra08173a), 2017-01-01
Supplement: c7ra08173a1.pdf [file c7ra08173a1.pdf]

## Supporting information

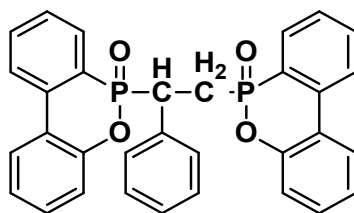

Fig. S1 Chemical structure of DiDOPO.

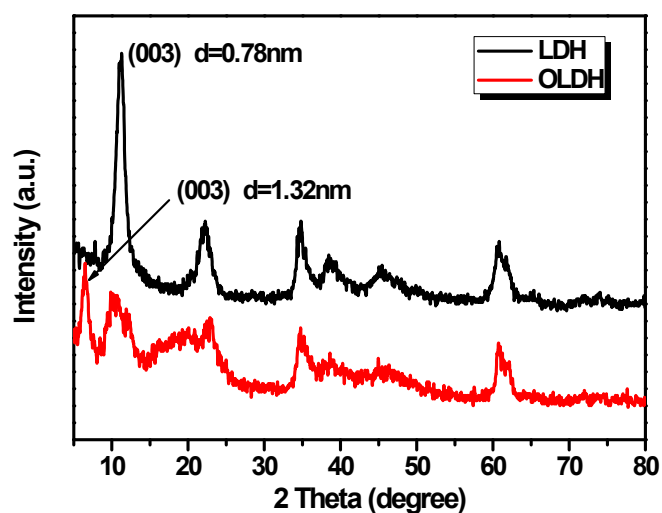

Fig.S2 XRD patterns of LDH and OLDH.

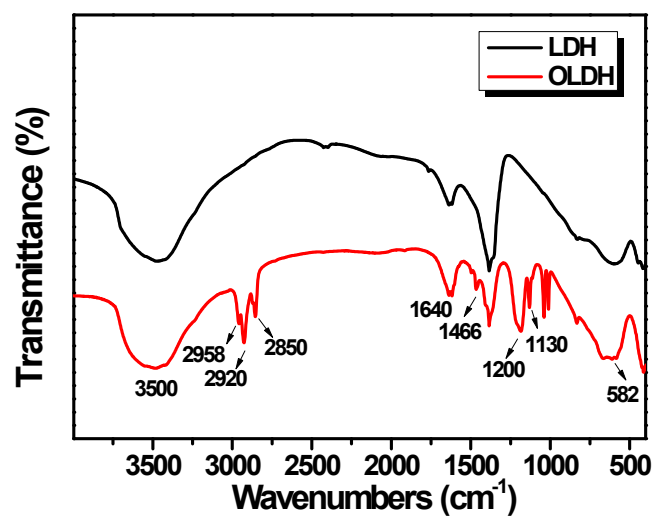

Fig.S3 FT-IR spectra of LDH and OLDH.

**Table S1** Mechanical properties of EP, EP/DiDOPO, EP/OLDH, and EP/DiDOPO/OLDH composites

| composites           | Tensile strength (MPa) | Flexural strength (MPa) | Izod notched impact strength (kJ·m <sup>-2</sup> ) | Elongation at break (%) |
|----------------------|------------------------|-------------------------|----------------------------------------------------|-------------------------|
| EP                   | 43.8 ± 1.5             | 70.6 ± 2.4              | 7.0 ± 0.2                                          | 8.7 ± 0.2               |
| EP/DiDOPO1           | 48.3 ± 2.2             | 54.0 ± 1.3              | 5.3 ± 0.4                                          | 8.4 ± 0.1               |
| EP/DiDOPO5           | 53.9 ± 2.6             | 39.4 ± 1.9              | 2.5 ± 0.1                                          | 9.4 ± 0.5               |
| EP/DiDOPO10          | 34.6 ± 1.4             | 41.1 ± 1.4              | 6.3 ± 0.4                                          | 5.3 ± 0.4               |
| EP/OLDH1             | 45.9 ± 1.1             | 42.9 ± 2.7              | 2.5 ± 0.2                                          | 6.0 ± 0.1               |
| EP/OLDH5             | 47.2 ± 2.1             | 63.9 ± 1.7              | 2.3 ± 0.3                                          | 6.5 ± 0.2               |
| EP/OLDH10            | 42.9 ± 1.3             | 49.8 ± 1.6              | 2.4 ± 0.5                                          | 6.2 ± 0.1               |
| EP/DiDOPO0.5/OLDH0.5 | 37.9 ± 1.0             | 81.5 ± 2.1              | 3.4 ± 0.4                                          | 6.8 ± 0.4               |
| EP/DiDOPO2.5/OLDH2.5 | 35.4 ± 1.2             | 82.6 ± 2.3              | 2.7 ± 0.3                                          | 6.5 ± 0.5               |
| EP/DiDOPO5/OLDH5     | 61.5 ± 1.5             | 88.4 ± 1.1              | 2.3 ± 0.1                                          | 8.5 ± 0.2               |
